# Supplementary material for: Identification and Characterization of Colletotrichum Species Causing Sorghum Anthracnose in Kenya and Screening of Sorghum Germplasm for Resistance to Anthracnose
Source: MDPI journal article supplement (doi:10.3390/jof9010100), 2023-01-11
Supplement: s1 [file s1]

## Supplementary Material

### Supplementary Tables

**Supplementary Table S1.** List of samples with their respective symptoms observed in the field.

| County   | S/No | Sample ID | Symptoms Observed in the Field                                                                                      |
|----------|------|-----------|---------------------------------------------------------------------------------------------------------------------|
| Kitui    | 1    | KT001-A   | Small and elongated elliptical necrotic lesions on the leaf blade                                                   |
|          | 2    | MUT006-B  | Small, elliptical red lesions with tan centers<br>Presence of fruiting bodies on dark lesions                       |
|          | 3    | IKA009-G  | Small and elongated elliptical necrotic lesions on the leaf blade                                                   |
|          | 4    | KY006     | Small, elliptical red lesions with tan centers<br>Presence of fruiting bodies on dark lesions                       |
|          | 5    | WA022     | Small, elliptical red lesions with tan centers<br>Presence of fruiting bodies on dark lesions                       |
|          | 6    | KAY062    | Small, elliptical red lesions with tan centers<br>Reddish discoloration on the midrib                               |
|          | 7    | IKU027    | Small, elliptical red lesions with tan centers<br>Reddish discoloration on the midrib                               |
|          | 8    | IKT011    | Dark brown circular spots<br>Necrotic sunken lesions on the leaf surface                                            |
|          | 9    | KY049     | Both small and elongated elliptical necrotic lesions on the leaf blade<br>Red lesions on the midrib and leaf sheath |
|          | 10   | KAM035    | Small and elongated elliptical necrotic lesions on the leaf blade<br>Necrotic sunken lesions on the leaf blade      |
| Makueni  | 11   | KAT015-A  | Both small and elongated elliptical necrotic lesions on the leaf blade                                              |
|          | 12   | MAK007-D  | Dark brown circular spots<br>Necrotic sunken lesions on the leaf surface                                            |
|          | 13   | W008-L    | Small and elongated elliptical necrotic lesions on the leaf blade                                                   |
|          | 14   | MAV071    | Dark brown circular spots<br>Necrotic sunken lesions on the leaf surface                                            |
|          | 15   | KAT055    | Small and elongated elliptical necrotic lesions on the leaf blade<br>Necrotic sunken lesions on the leaf blade      |
|          | 16   | KAT050    | Small and elongated elliptical necrotic lesions on the leaf blade<br>Necrotic sunken lesions on the leaf blade      |
|          | 17   | KK038     | Both small and elongated elliptical necrotic lesions on the leaf blade                                              |
| Machakos | 18   | MTH022-A  | Small and elongated elliptical necrotic lesions on the leaf blade<br>Necrotic sunken lesions on the leaf blade      |
|          | 19   | KI080     | Small and elongated elliptical necrotic lesions on the leaf blade<br>Necrotic sunken lesions on the leaf blade      |
|          | 20   | MKS078    | Red lesions on the midrib and leaf sheath                                                                           |
|          | 21   | MV089     | Small, elliptical red lesions with tan centers<br>Presence of fruiting bodies on dark lesions                       |
|          | 22   | MAT094    | Small, elliptical red lesions with tan centers<br>Reddish discoloration on the midrib                               |
|          | 23   | ND098     | Small, elliptical red lesions with tan centers<br>Reddish discoloration on the midrib                               |
|          | 24   | MTH092    | Small, elliptical red lesions with tan centers<br>Reddish discoloration on the midrib                               |
|          | 25   | MAS101    | Dark brown circular spots<br>Necrotic sunken lesions on the leaf surface                                            |

|  |    |        |                                                                          |
|--|----|--------|--------------------------------------------------------------------------|
|  | 26 | MAS103 | Dark brown circular spots<br>Necrotic sunken lesions on the leaf surface |
|--|----|--------|--------------------------------------------------------------------------|

**Supplementary Table S2.** Results of pathogenicity tests at 10 d after inoculation of the sorghum cultivars expressed as a disease severity score (mean  $\pm$  standard deviation). Severity score 0 –no symptoms, 1 – discrete lesions (necroses) less than 2 mm in length, 2 – lesion occupying less than 25 % of leaf surface, 3 – lesion occupying half of leaf surface, 4 – lesion occupying entire leaf surface and 5 –lesion with abundant sporulation .

| County   | Isolate ID | Pathogenicity |
|----------|------------|---------------|
| Makueni  | KAT015-A   | 3.7 $\pm$ 1.3 |
| Kitui    | KAT001-A   | 4.3 $\pm$ 0.9 |
| Makueni  | W008-L     | 4.0 $\pm$ 1.4 |
| Kitui    | MUT006-B   | 3.9 $\pm$ 1.4 |
| Makueni  | MAK017-D   | 3.6 $\pm$ 1.3 |
| Kitui    | IKA009-G   | 3.8 $\pm$ 1.3 |
| Machakos | MTH022-A   | 4.1 $\pm$ 1.1 |

**Supplementary Table S3.** Comparison between *Colletotrichum sublineola* and *Colletotrichum eremochloae*. Source; Crouch and Tomaso (2021).

| <i>Colletotrichum sublineola</i> (Strain MB529591)                                                                                                                                                                                                                                                                                                                                                                                                                                                                                                                           | <i>Colletotrichum eremochloae</i> (Strain CBS129661)                                                                                                                                                                                                                                                                                                                                                                                                                                                                                                                                                                                                              |
|------------------------------------------------------------------------------------------------------------------------------------------------------------------------------------------------------------------------------------------------------------------------------------------------------------------------------------------------------------------------------------------------------------------------------------------------------------------------------------------------------------------------------------------------------------------------------|-------------------------------------------------------------------------------------------------------------------------------------------------------------------------------------------------------------------------------------------------------------------------------------------------------------------------------------------------------------------------------------------------------------------------------------------------------------------------------------------------------------------------------------------------------------------------------------------------------------------------------------------------------------------|
| <p><b>Colony color:</b> Ranges from white to pink and dark gray to clear-gray</p> <p><b>Conidia:</b> Falcate, oval to fusiform, hyaline, unicellular, non-septate with rounded ends.</p> <p><b>Hyphal appressoria:</b> abundant in culture Single-celled, dark to hyaline, globose to sub-globose shaped</p> <p><b>Nucleotide sequences;</b> Has a fixed nucleotide differences at nuclear internal transcribed spacer region Apn2, Apn2/Mat1 and Sod2 when amplified and sequenced with PCR primers ITS4/ITS5, Mat1M72F/ Mat1M72R, Apn1W1F/Apn1W1R and SOD625F/SOD625R.</p> | <p><b>Colony color:</b> light to dark grey without visible conidial masses with a bright yellow perimeter surrounding the colony</p> <p><b>Conidia:</b> one-celled, Falcate sometimes fusiform, Smooth, hyaline, Setae &amp; Sclerotia absent</p> <p><b>Hyphal appressoria:</b> abundant in culture, medium to dark brown, globose, ovoid, Clavate, lobate or multilobate, and obtuse. apices</p> <p><b>Nucleotide sequences;</b> Has a fixed nucleotide differences at nuclear internal transcribed spacer region Apn2, Apn2/Mat1 and Sod2 when amplified and sequenced with PCR primers ITS4/ITS5, Mat1M72F/ Mat1M72R, Apn1W1F/Apn1W1R and SOD625F/SOD625R.</p> |

**Supplementary Table S4.** Basic information of the fungal strains used to construct the phylogenetic tree.

| ID        | Accession number | Species              | Country | year | Host        |
|-----------|------------------|----------------------|---------|------|-------------|
| IKA009-G* |                  | <i>C. sublineola</i> | Kenya   |      | Sorghum sp. |
| KAT015-A* |                  | <i>C. sublineola</i> | Kenya   |      | Sorghum sp. |
| KT001-A*  |                  | <i>C. sublineola</i> | Kenya   |      | Sorghum sp. |
| MAK017-D* |                  | <i>C. sublineola</i> | Kenya   |      | Sorghum sp. |

|              |             |                         |             |      |                              |
|--------------|-------------|-------------------------|-------------|------|------------------------------|
| MTH022-A*    |             | <i>C. sublineola</i>    | Kenya       |      | Sorghum sp.                  |
| MUT006-B*    |             | <i>C. sublineola</i>    | Kenya       |      | Sorghum sp.                  |
| W008-L*      |             | <i>C. sublineola</i>    | Kenya       |      | Sorghum sp.                  |
| IR-06        | AB242422    | <i>C. falcatum</i>      | India       | N/A  | Sorghum sp.                  |
| MAFF 511474  | AB439813    | <i>C. sublineola</i>    | Japan       | 2000 | Sorghum bicolor              |
| MAFF 243051  | AB738855    | <i>C. hsienjenchang</i> | Japan       | 2011 | Phyllostachys bambusoides    |
| S26          | EF016297    | <i>C. truncatum</i>     | China       | 2006 | Tobacco                      |
| S35          | EF016299    | <i>C. truncatum</i>     | China       | 2006 | Tobacco                      |
| DAOM116226   | EU400155    | <i>C. brassicae</i>     | Canada      | 2008 | N/A                          |
| 1818         | FJ236462    | <i>C. dematium</i>      | Bulgaria    | N/A  | Statice                      |
| CY125        | HQ607974    | <i>C. caudatum</i>      | USA         | 2006 | Cyphomyrmex wheeleri nest    |
| Cf-17        | HQ833662    | <i>C. falcatum</i>      | N/A         | N/A  | N/A                          |
| CBS 129663   | JQ005774    | <i>C. cereale</i>       | N/A         | N/A  | N/A                          |
| CDLG3        | JQ400004    | <i>C. liriopes</i>      | China       | N/A  | Hemerocallis fulva           |
| Co-38-Zac    | JQ658887    | <i>C. sublineola</i>    | Mexico      | N/A  | Sorghum halepense            |
| CDRJ01       | JQ677042    | <i>C. dematium</i>      | South Korea | N/A  | Rohdea japonica Roth         |
| I137         | KC598120    | <i>C. spaethianum</i>   | Brazil      | N/A  | Hemerocallis lilioasphodelus |
| MAFF305403   | KC790948    | <i>C. paspali</i>       | India       | N/A  | N/A                          |
| MAFF305404   | KC790949    | <i>C. hanaui</i>        | India       | N/A  | N/A                          |
| MAFF511115   | KC790951    | <i>C. nicholsonii</i>   | India       | N/A  | N/A                          |
| MAFF511155   | KC790952    | <i>C. eleusines</i>     | India       | N/A  | N/A                          |
| MTCC10326    | KC790960    | <i>C. navitas</i>       | India       | N/A  | N/A                          |
| SimpsonStem1 | KU171107    | <i>C. sublineola</i>    | USA         | N/A  | Sorghum bicolor              |
| CSB_F052     | KU574683    | <i>C. echinocloae</i>   | Kenya       | N/A  | Brachiaria sp.               |
| VIC32T       | KU821158    | <i>C. coccodes</i>      | Australia   | N/A  | potato                       |
| USANY        | KU821176    | <i>C. nigrum</i>        | USA         | N/A  | potato                       |
| BRIP 63314c  | KX069822    | <i>C. tofieldiae</i>    | Australia   | N/A  | Grevillea crithmifolia       |
| RJ6          | MH005034    | <i>C. liriopes</i>      | USA         | N/A  | Rohdea japonica              |
| I-3          | MN636355    | <i>C. falcatum</i>      | Bangladesh  | N/A  | Sugarcane                    |
| CZPMP-17     | MN889462    | <i>C. sublineola</i>    | India       | 2019 | Pennisetum                   |
| SI24         | MT077154    | <i>C. duyunense</i>     | China       | N/A  | Sinoseneciooldhamianus       |
| CNUCC 303221 | MT199610    | <i>C. bambusicola</i>   | China       | N/A  | Phyllostachys aureosulcata   |
| CNUCC 307304 | MT199631    | <i>C. guangxiense</i>   | China       | N/A  | Phyllostachys edulis         |
| MV101        | MW054252    | <i>C. graminicola</i>   | N/A         | N/A  | N/A                          |
| YMF 1.06700  | MW722955.1  | <i>C. garzense</i>      | China       | N/A  | N/A                          |
| IMI 279189   | NR_171193.1 | <i>C. axonopodis</i>    | Australia   | N/A  | Axonopus fissifolius         |
| CBS 129664   | MH865530.1  | <i>C. eremochloae</i>   | N/A         | N/A  | N/A                          |
| CBS 129661   | MH865527.1  | <i>C. eremochloae</i>   | N/A         | N/A  | N/A                          |

\* Represents strains from the current study.

**Supplementary Table S5.** Regression analysis between sorghum anthracnose and yield components. \*Dependent Variable: Anthracnose .

| Coefficients*    |                             |            |                           |        |      |
|------------------|-----------------------------|------------|---------------------------|--------|------|
| Model            | Unstandardized Coefficients |            | Standardized Coefficients | t      | Sig. |
|                  | B                           | Std. Error | Beta                      |        |      |
| (Constant)       | 6.207                       | 13.729     |                           | .452   | .665 |
| Grain weight     | .139                        | .139       | 1.185                     | 1.001  | .350 |
| Grain Yield t/ha | -3.396                      | 4.653      | -2.182                    | -.730  | .489 |
| 100seeds (g)     | -7.249                      | 3.280      | -1.745                    | -2.210 | .063 |

## Supplementary Figures

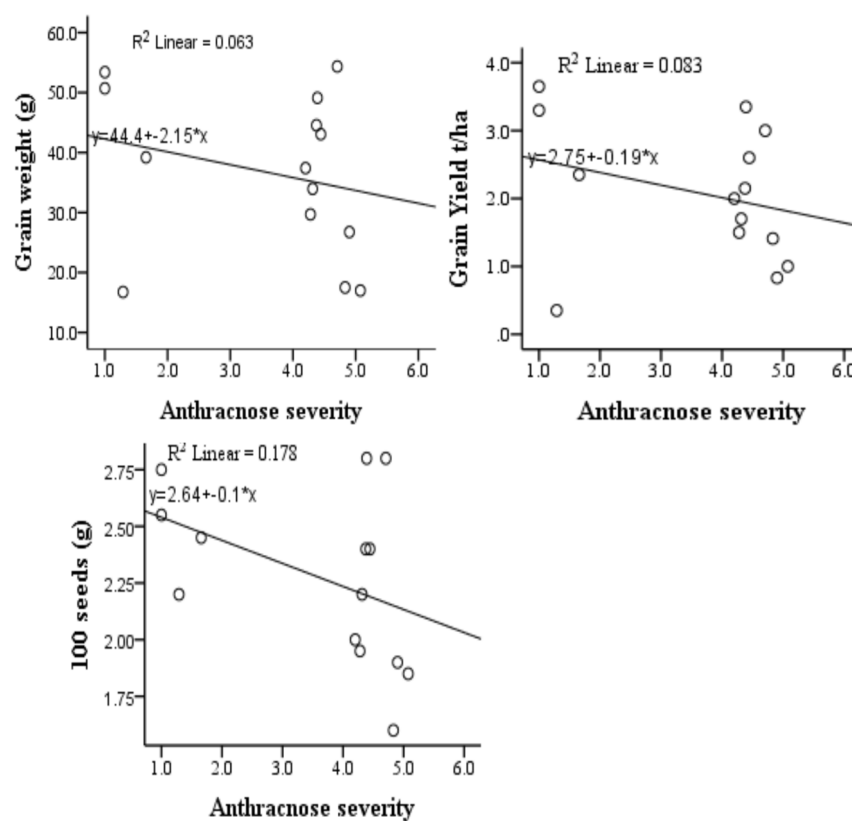

Supplementary Figure S1. Regression analysis on the effect of sorghum anthracnose on yield of local and improved genotypes obtained from lower eastern Kenya.

## References

1. Crouch, J.A.; Tomaso, P.M. Anthracnose disease of centipegrass turf caused by *Colletotrichum eremochloae*, a fungal species closely related to *Colletotrichum sublineola*. *Mycologia* **2021**, *104*, 1085–1096.
